# Supplementary material for: Synthesis and characterization of a conjugated porphyrin dyad entangled with carboxyl functionalized benzimidazolium: an efficient metal free sensitizer for DSSCs
Source: Royal Society of Chemistry journal article supplement (doi:10.1039/d0nj05387b), 2020-12-08
Supplement: d0nj05387b1.pdf [file d0nj05387b1.pdf]

Electronic Supplementary Material (ESI) for New Journal of Chemistry.

**Supplementary Information:**

**Synthesis and Characterization of Conjugated Porphyrin Dyad Entangled with Carboxyl Functionalized Benzimidazolium: An Efficient Metal Free Sensitizer for DSSC**

*Darpan V Bhuse, Pundlik R. Bhagat\**

**Department of Chemistry, School of Advanced Sciences, Vellore Institute of Technology, Vellore, Tamilnadu- 632014, India**

| S. No. | Content                                                                                                                                                                                           | Fig |
|--------|---------------------------------------------------------------------------------------------------------------------------------------------------------------------------------------------------|-----|
| 1      | <sup>1</sup> H NMR spectrum of 1,4-phenylene bis (ethene-2,1-diyl) dianiline -1A                                                                                                                  | S1  |
| 2      | <sup>13</sup> C NMR spectrum of 1,4-phenylene bis (ethene-2,1-diyl) dianiline -1A                                                                                                                 | S2  |
| 3      | <sup>1</sup> H NMR spectrum of 1,4-phenylenebis (ethene-2,1-diyl) bis(4,1-phenylene) bis(2-chloroacetamide) -1B                                                                                   | S3  |
| 4      | <sup>13</sup> C NMR spectrum of 1,4-phenylenebis (ethene-2,1-diyl) bis(4,1-phenylene) bis(2-chloroacetamide) -1B                                                                                  | S4  |
| 5      | <sup>1</sup> H NMR Spectrum of 5- (Chloromethyl)-2- Hydroxybenzaldehyde-2A                                                                                                                        | S5  |
| 6      | <sup>13</sup> C NMR Spectrum of 5- (Chloromethyl)-2- Hydroxybenzaldehyde-2A                                                                                                                       | S6  |
| 7      | <sup>1</sup> H NMR Spectrum of 5-((1H-Benzoimidazole-1-yl) methyl)-2- Hydroxybenzaldehyde 2B                                                                                                      | S7  |
| 8      | <sup>13</sup> C NMR Spectrum of 5-((1H-Benzoimidazole-1-yl) methyl)-2- Hydroxybenzaldehyde 2B                                                                                                     | S8  |
| 9      | <sup>1</sup> H NMR Spectrum of 3-(-2-carboxyethyl)-1-(-3-formyl-4-hydroxybenzyl)-1H-benzoimidazole-3-ium, 2C                                                                                      | S9  |
| 10     | <sup>13</sup> C NMR Spectrum of 3-(-2-carboxyethyl)-1-(-3-formyl-4-hydroxybenzyl)-1H-benzoimidazole-3-ium, 2C                                                                                     | S10 |
| 11     | <sup>1</sup> H NMR Spectrum of 1,1-(((1,4-phenylenebis(ethene-2,1-diyl))bis(4,1-phenylene))bis(azanediyl))bis(2-oxoethane-2,1-diyl))bis(3-(3-formyl-4-hydroxybenzyl)-1H-benzoimidazol-3-ium), 3A  | S11 |
| 12     | <sup>13</sup> C NMR Spectrum of 1,1-(((1,4-phenylenebis(ethene-2,1-diyl))bis(4,1-phenylene))bis(azanediyl))bis(2-oxoethane-2,1-diyl))bis(3-(3-formyl-4-hydroxybenzyl)-1H-benzoimidazol-3-ium), 3A | S12 |
| 13     | FT-IR Spectrum of 1,1-(((1,4-phenylenebis(ethene-2,1-diyl))bis(4,1-phenylene))bis(azanediyl))bis(2-oxoethane-2,1-diyl))bis(3-(3-formyl-4-hydroxybenzyl)-1H-benzoimidazol-3-ium), 3A               | S13 |
| 14     | <sup>1</sup> H NMR Spectrum of CPDCFBM, 3B                                                                                                                                                        | S14 |
| 15     | FT-IR Spectrum of CPDCFBM, 3B                                                                                                                                                                     | S15 |
| 16     | EDAX of Bare Dyad                                                                                                                                                                                 | S16 |
| 17     | EDAX of TiO <sub>2</sub> +Dyad                                                                                                                                                                    | S17 |

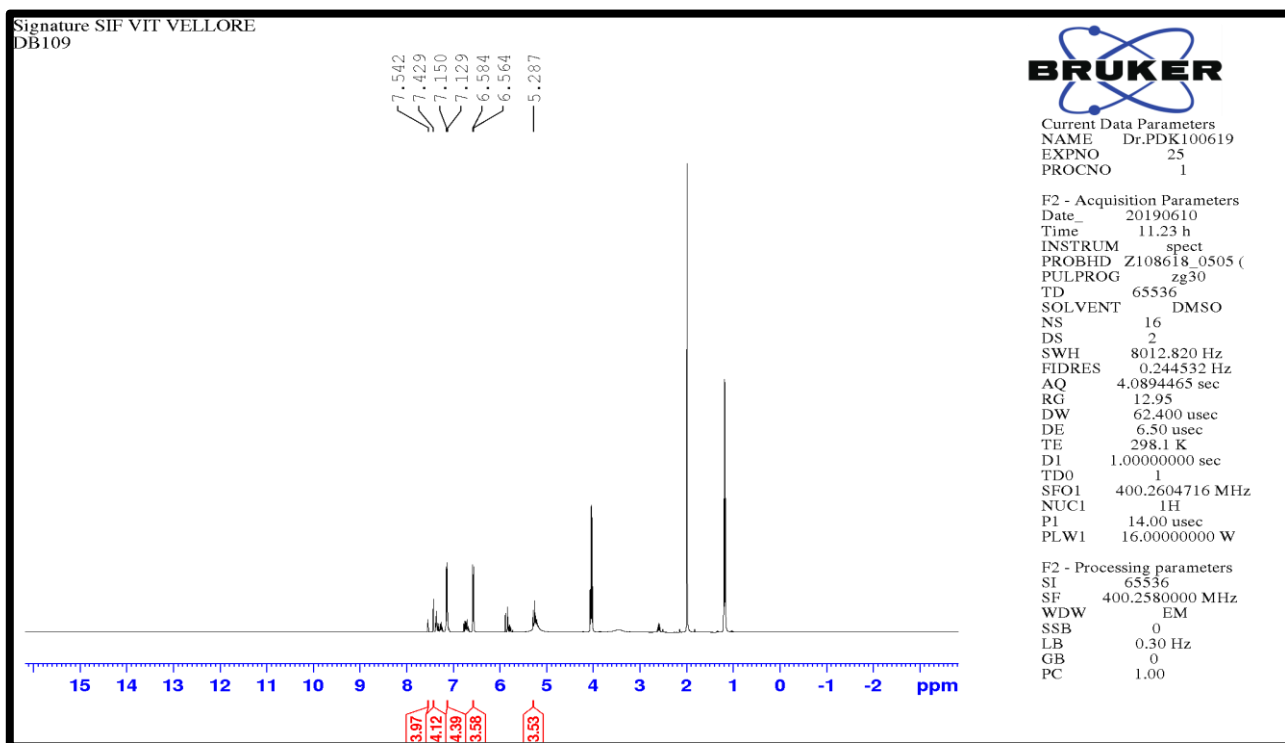

Fig S1  $^1\text{H}$  NMR spectrum of 1,4-phenylene bis (ethene-2,1-diyl) dianiline -1A

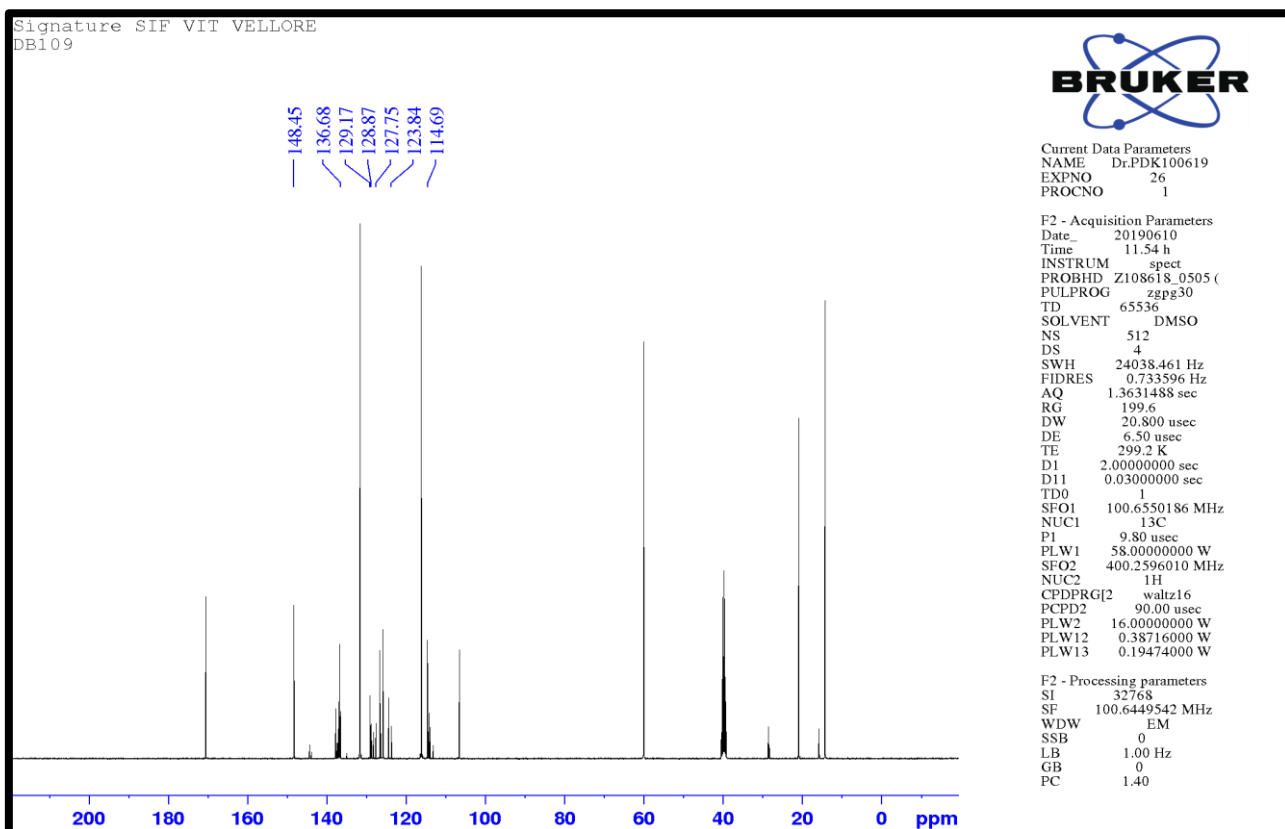

Fig S2  $^{13}\text{C}$  NMR spectrum of 1,4-phenylene bis (ethene-2,1-diyl) dianiline -1A

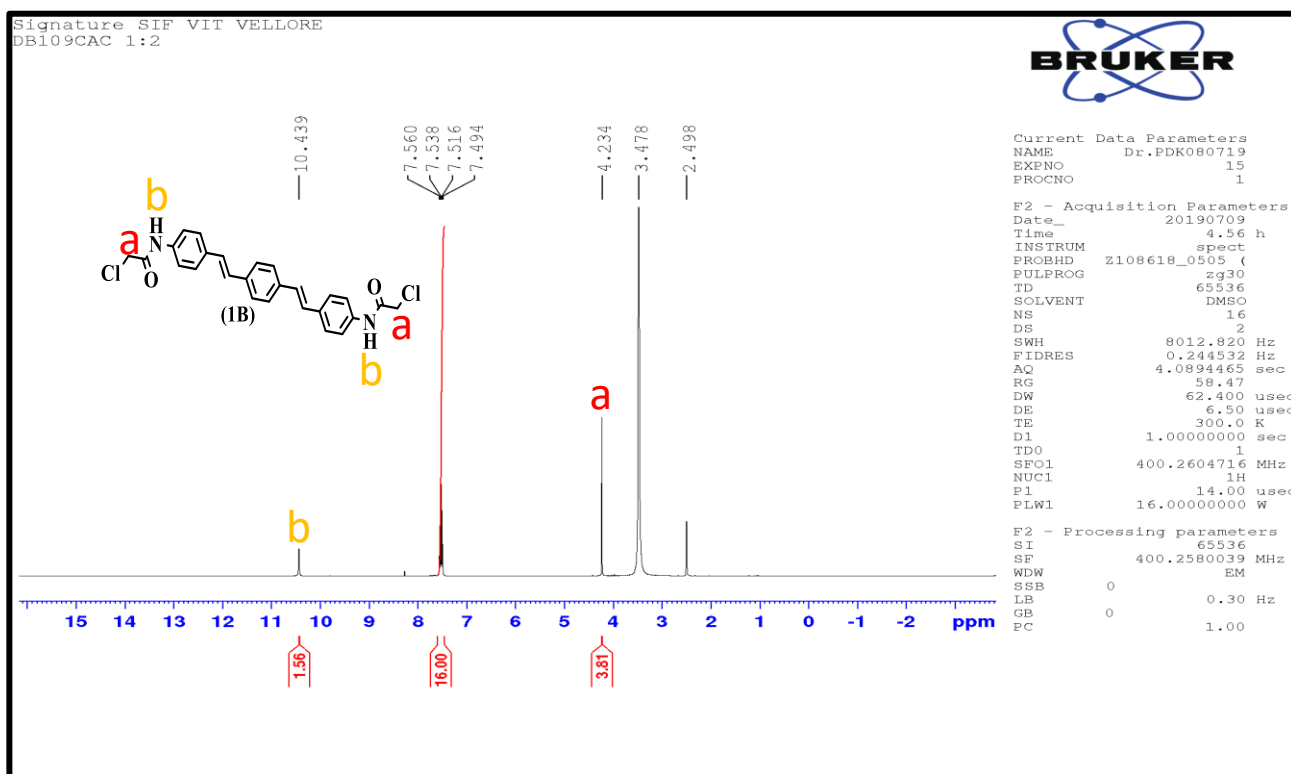

Fig S3  $^1\text{H}$  NMR spectrum of 1,4-phenylenebis (ethene-2,1-diyl) bis(4,1-phenylene) bis(2-chloroacetamide) 1B

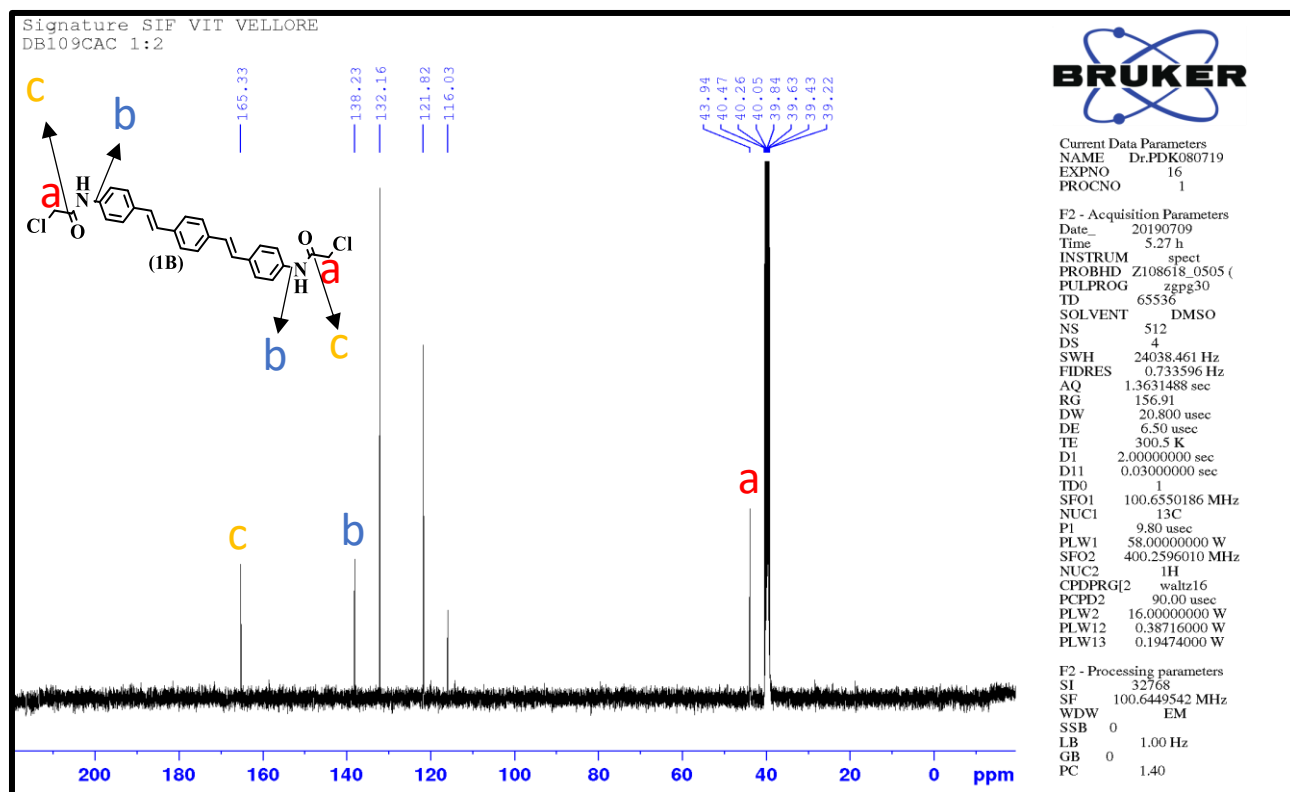

Fig S4  $^{13}\text{C}$  NMR spectrum of 1,4-phenylenebis (ethene-2,1-diyl) bis(4,1-phenylene) bis(2-chloroacetamide) -1B

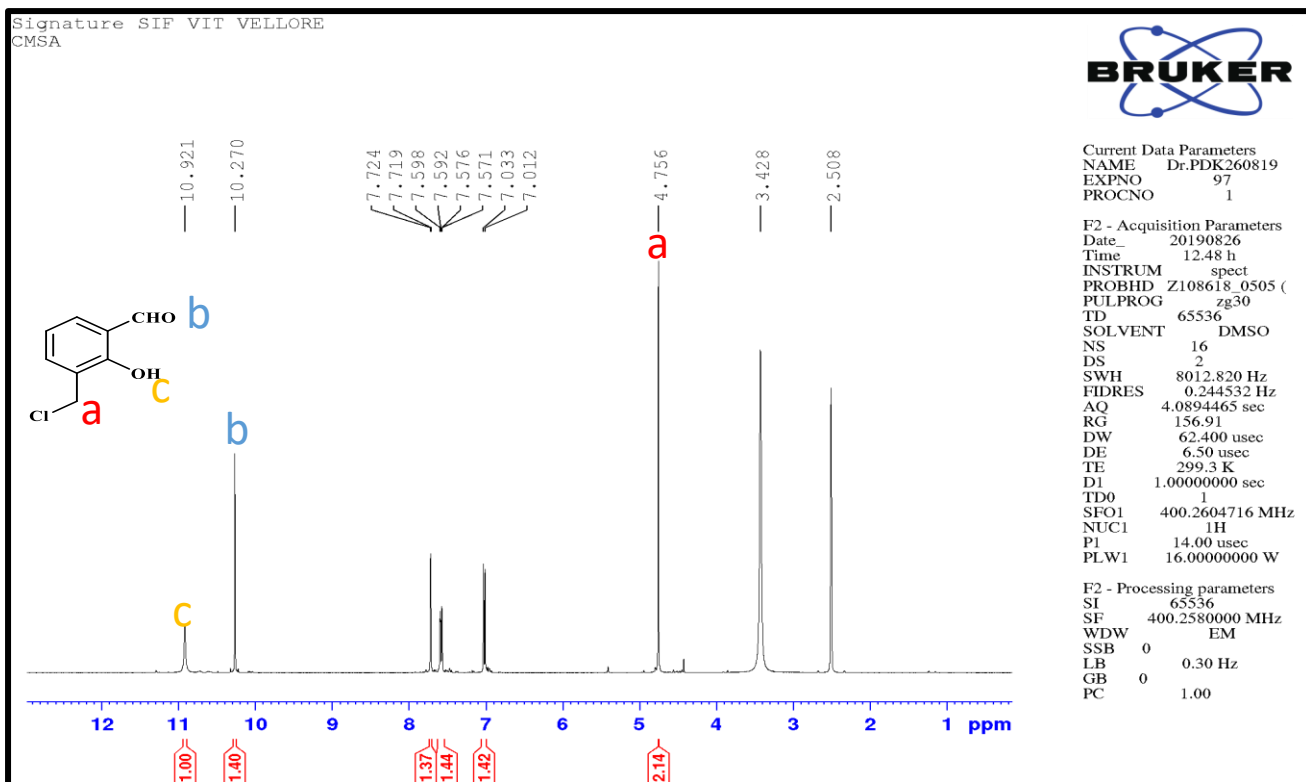

Fig S5  $^1\text{H}$  NMR Spectrum of 5- (Chloromethyl)-2- Hydroxybenzaldehyde-2A

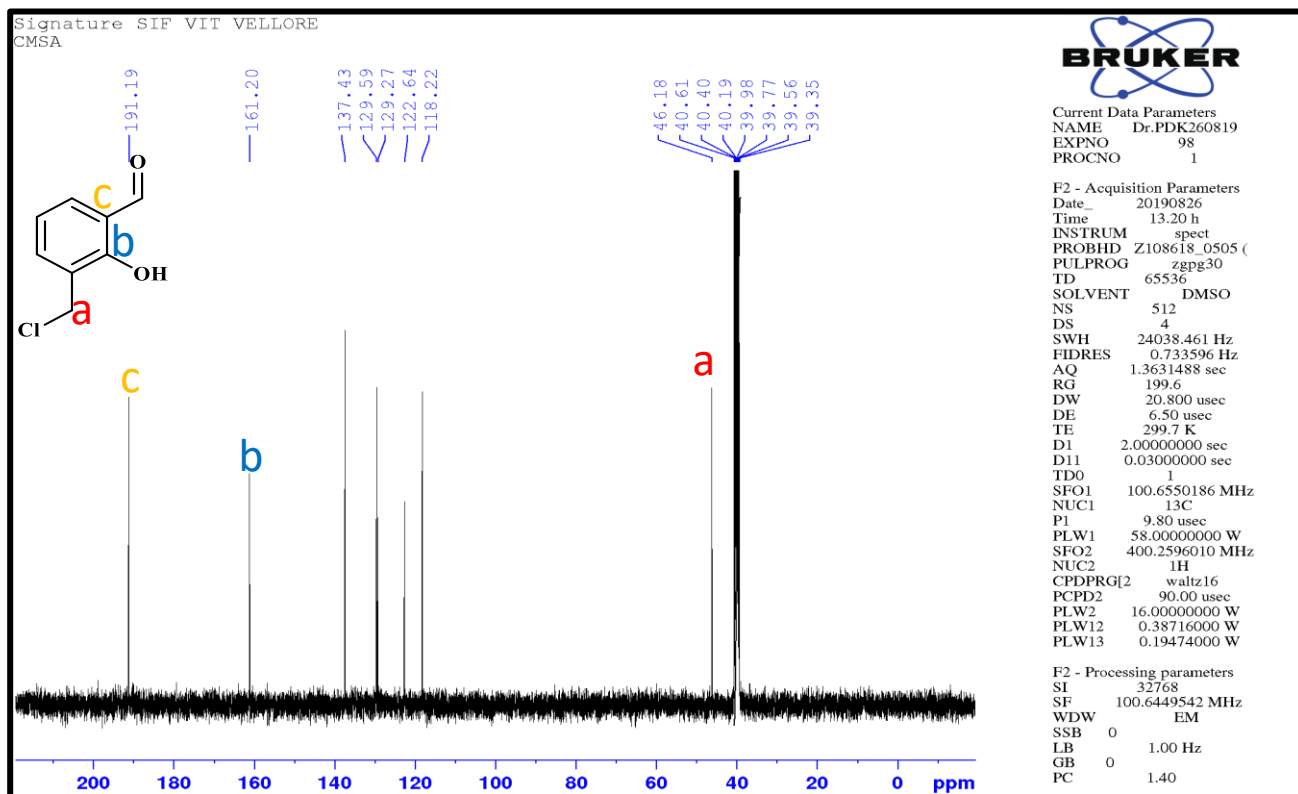

Fig S6  $^{13}\text{C}$  NMR Spectrum of 5- (Chloromethyl)-2- Hydroxybenzaldehyde-2A

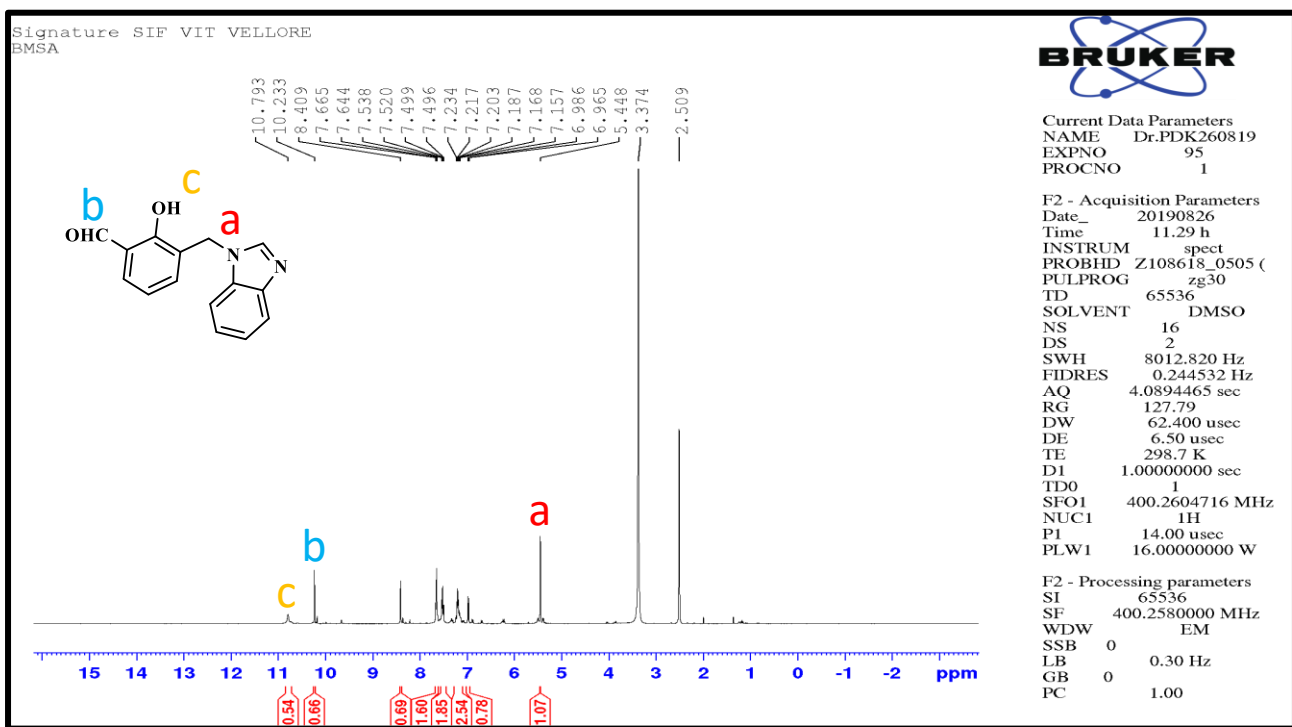

Fig S7 <sup>1</sup>H NMR Spectrum of 5-((1H-Benzoimidazole-1-yl) methyl)-2-Hydroxybenzaldehyde 2B

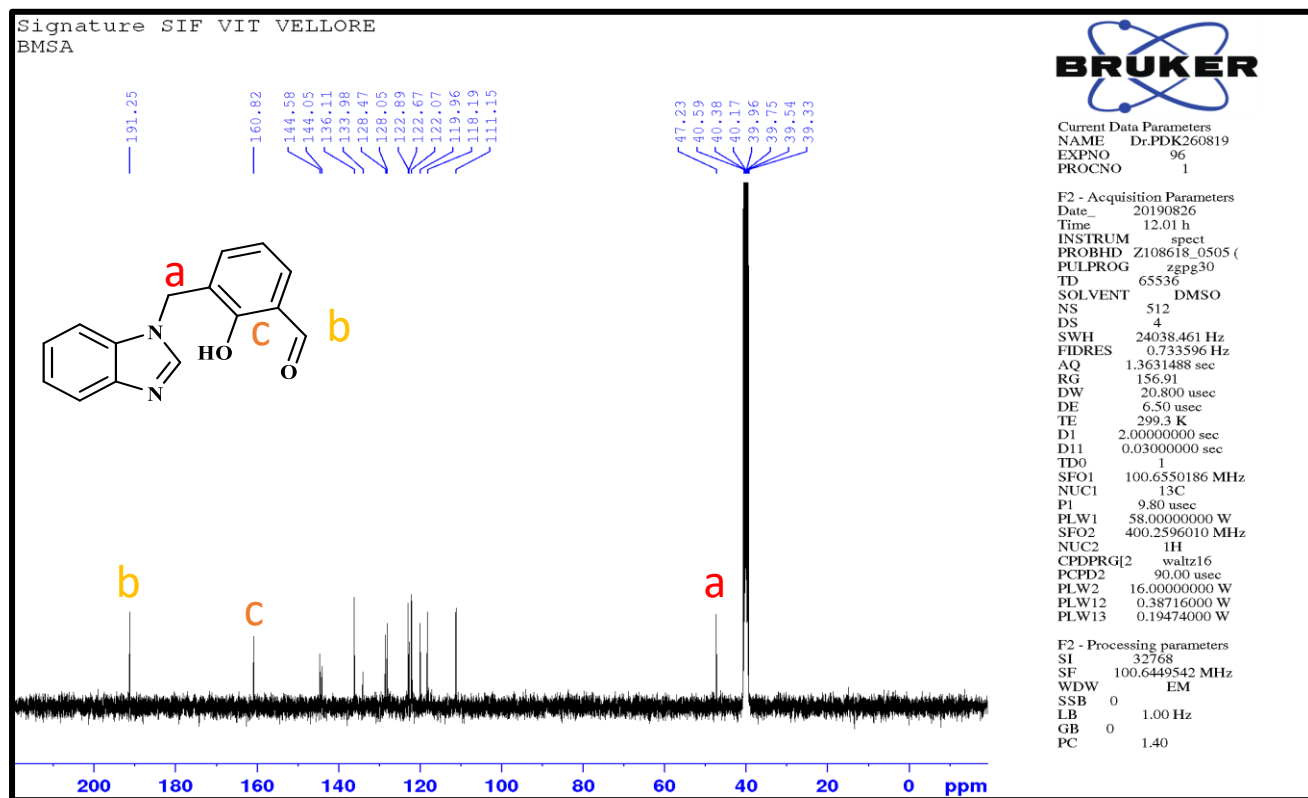

Fig S8 <sup>13</sup>C NMR Spectrum of 5-((1H-Benzoimidazole-1-yl) methyl)-2-Hydroxybenzaldehyde 2B

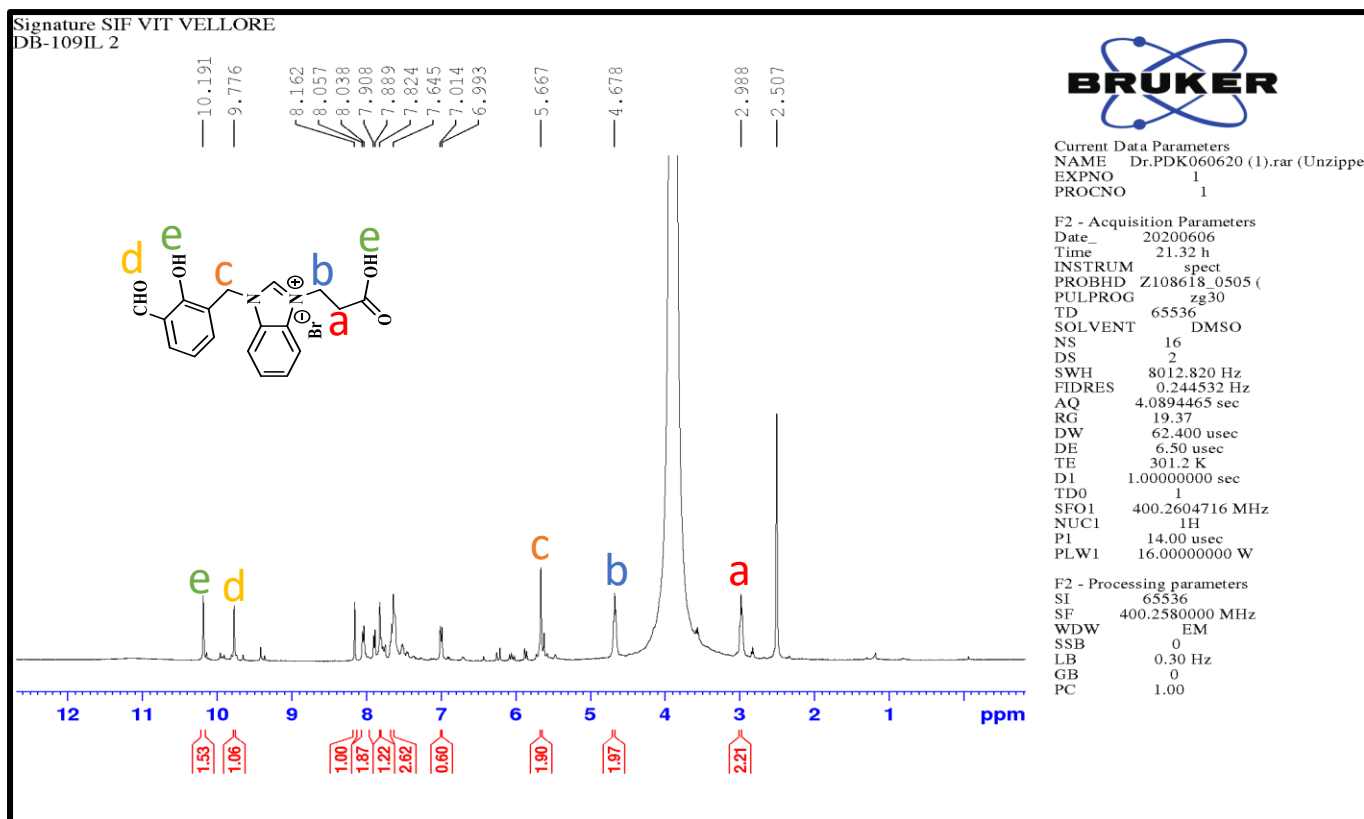

Fig S9 <sup>1</sup>H NMR Spectrum of 3-(2-carboxyethyl)-1-(3-formyl-4-hydroxybenzyl)-1H-benzoimidazole-3-ium-2C

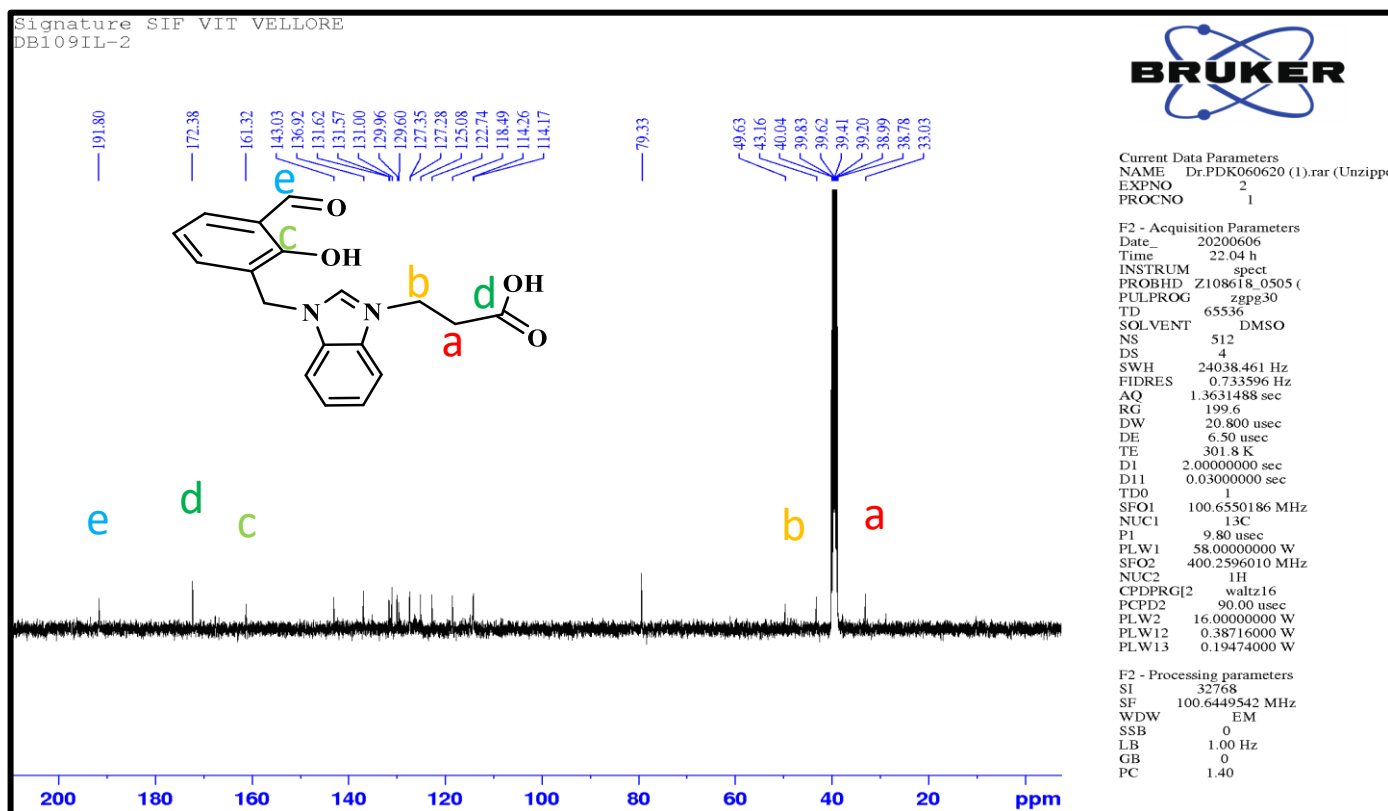

Fig S10 <sup>13</sup>C NMR Spectrum of 3-(2-carboxyethyl)-1-(3-formyl-4-hydroxybenzyl)-1H-benzoimidazole-3-ium-2C

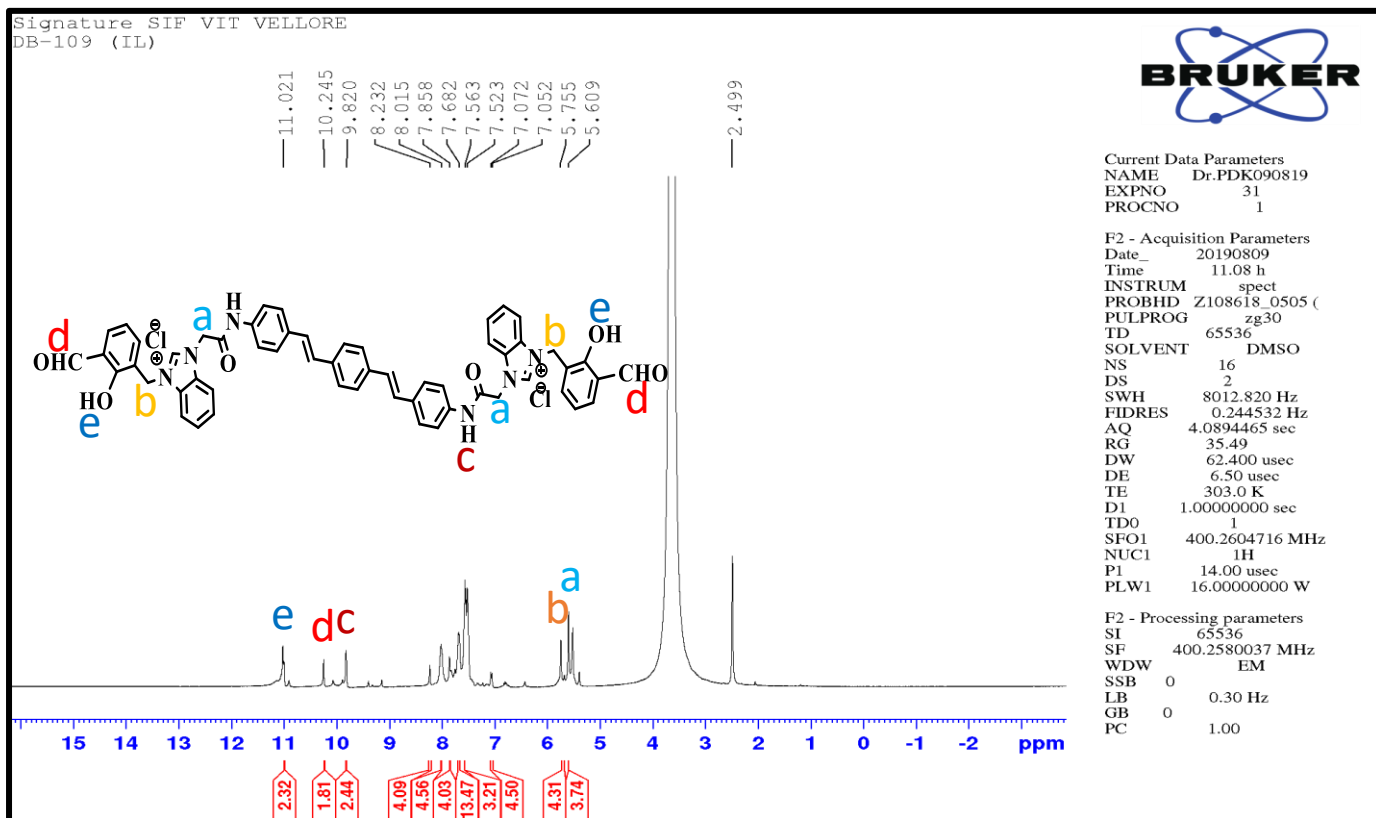

Fig S11 <sup>1</sup>H NMR Spectrum of 1,1-(((1,4-phenylenebis(ethene-2,1-diyl))bis(4,1-phenylene))bis(azanediy))bis(2-oxoethane-2,1-diyl))bis(3-(3-formyl-4-hydroxybenzyl)-1H-benzoimidazol-3-ium),3A

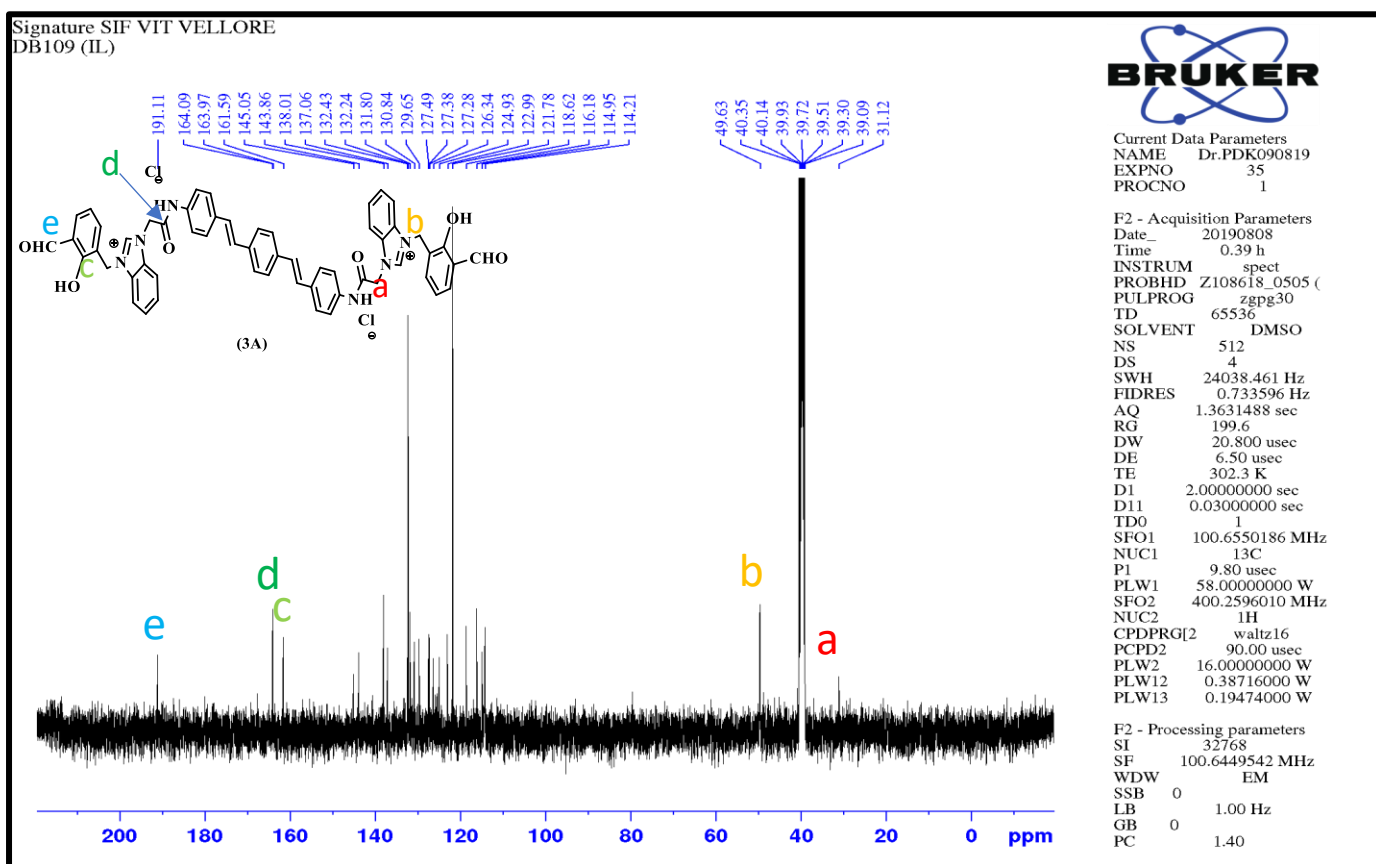

Fig S12 <sup>13</sup>C CMR Spectrum of 1,1-(((1,4-phenylenebis(ethene-2,1-diyl))bis(4,1-phenylene))bis(azanediy))bis(2-oxoethane-2,1-diyl))bis(3-(3-formyl-4-hydroxybenzyl)-1H-benzoimidazol-3-ium),3A

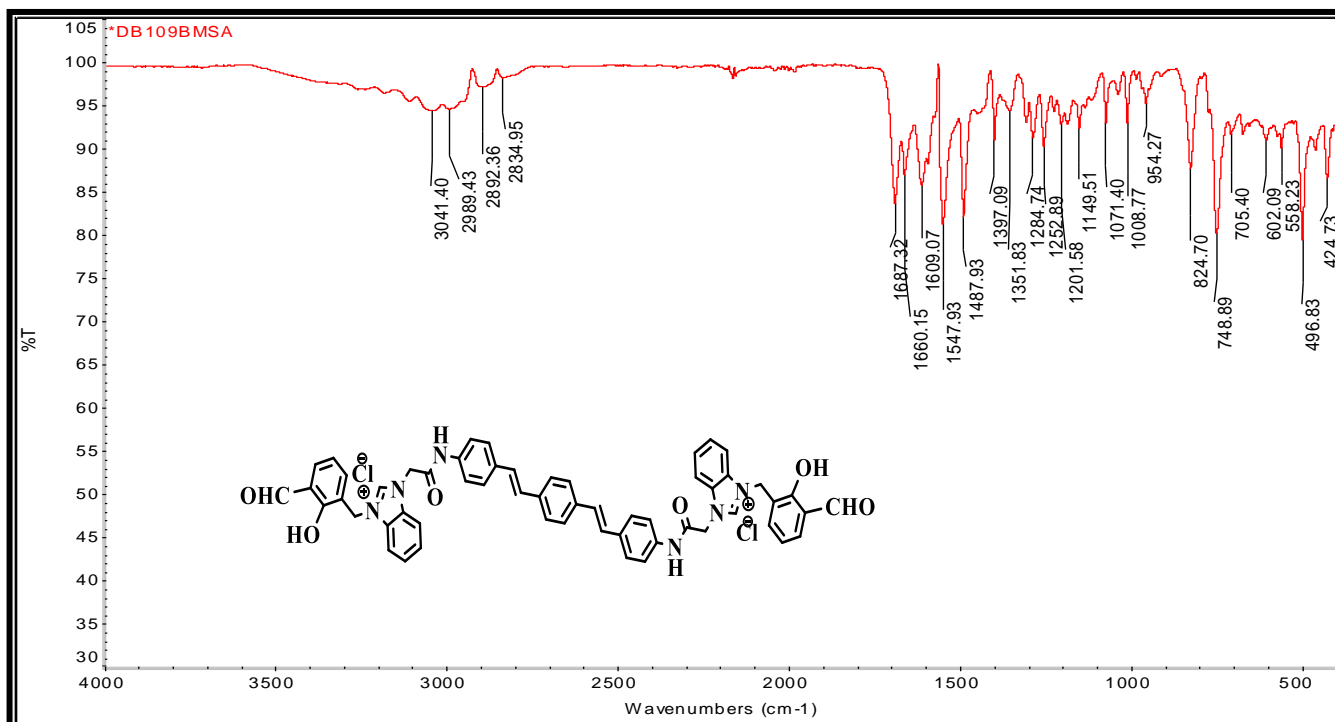

Fig S13 FTIR Spectrum of 1,1-(((1,4-phenylenebis(ethene-2,1-diyl))bis(4,1-phenylene))bis(azanediyl))bis(2-oxoethane-2,1-diyl))bis(3-(3-formyl-4-hydroxybenzyl)-1H-benzimidazol-3-ium), 3A



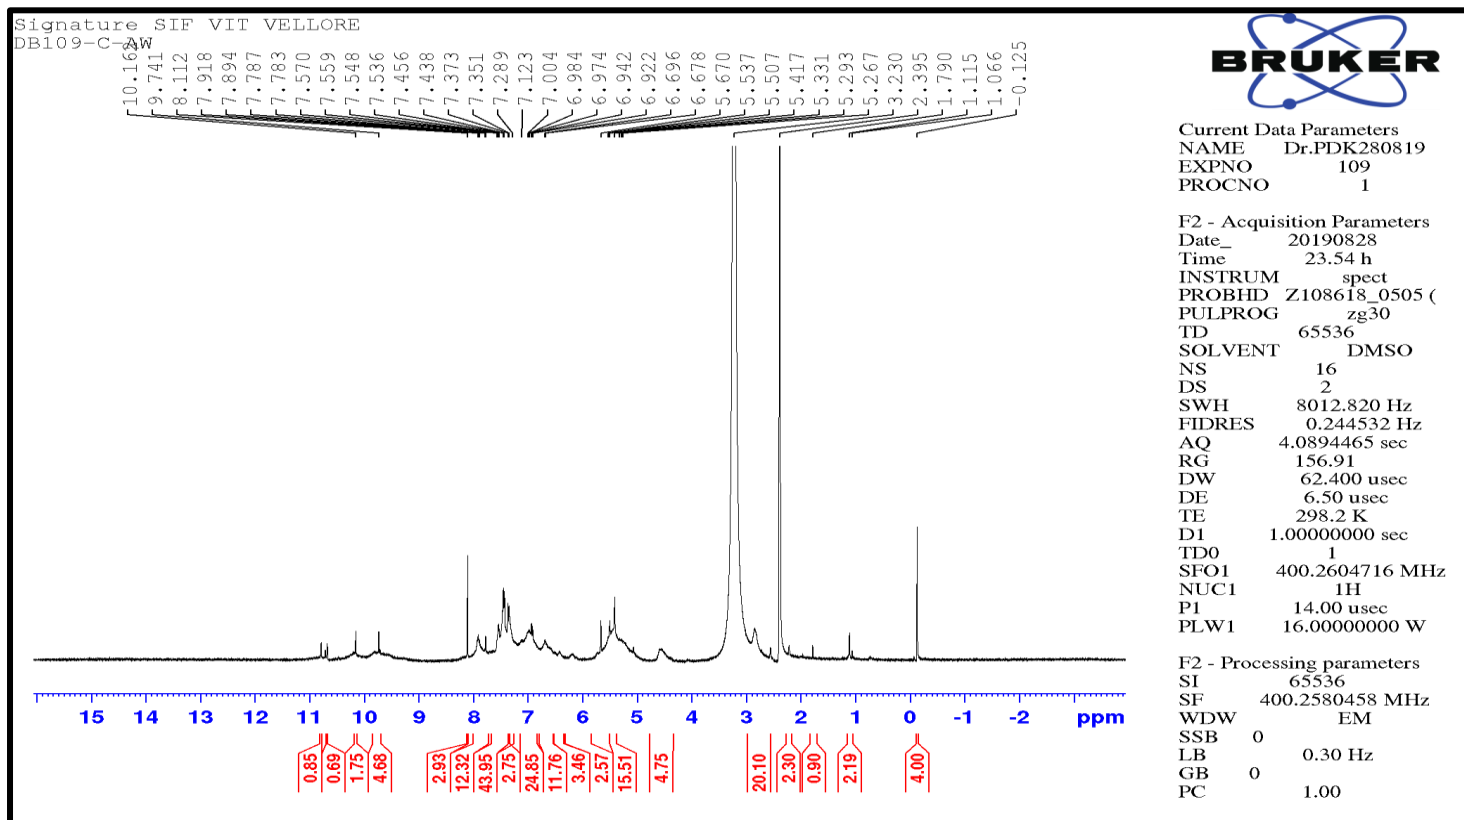

Fig S14 NMR spectrum of CPDCFBM, 3B

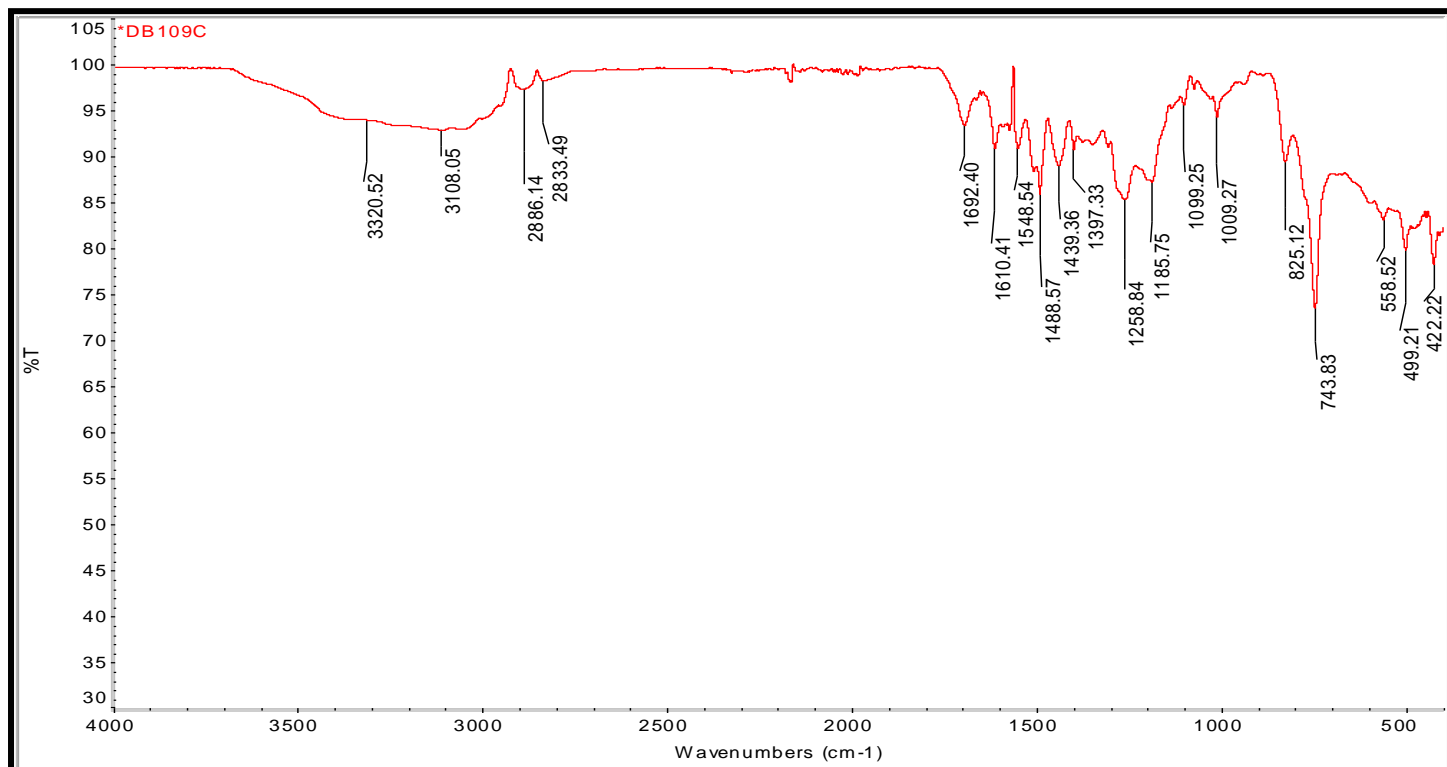

S15 FT-IR Spectrum of CPDCFBM, 3B

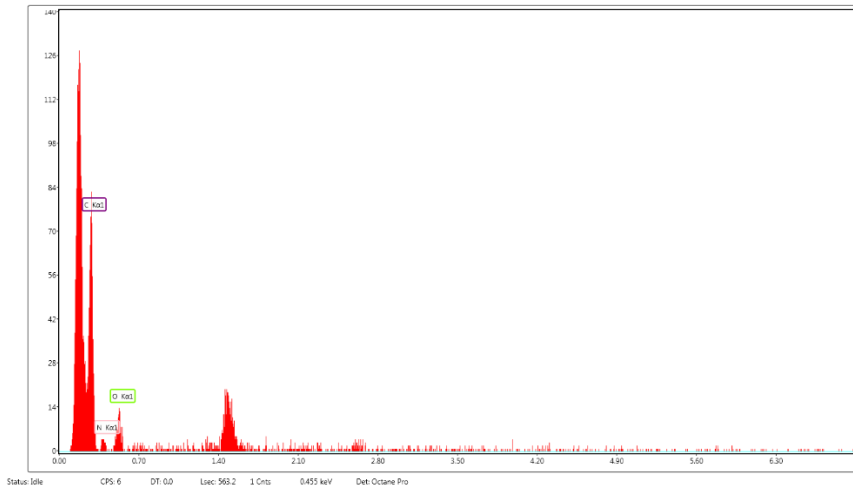

Fig S16. EDAX of Dyad

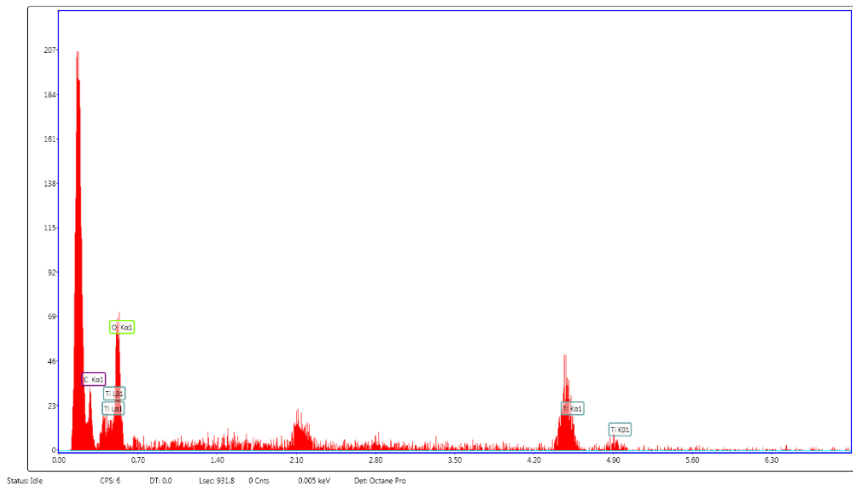

Fig S17. EDAX of TiO<sub>2</sub> with Dyad
